# Supplementary material for: Amorphous Cr-doped g-C3N4 as an efficient catalyst for the direct hydroxylation of benzene to phenol
Source: Royal Society of Chemistry journal article supplement (doi:10.1039/c9nj03483h), 2019-01-01
Supplement: c9nj03483h7.pdf [file c9nj03483h7.pdf]

## Supporting Information

### **Amorphous Cr-doped g-C<sub>3</sub>N<sub>4</sub> as an efficient catalyst for the direct hydroxylation of benzene to phenol**

Tianhao Cao,<sup>a</sup> Menglu Cai,<sup>a</sup> Leilei Jin,<sup>a</sup> Xiaozhong Wang,<sup>a</sup> Jie Yu,<sup>\*ab</sup> Yingqi Chen<sup>a</sup>  
and Liyan Dai<sup>\*a</sup>

<sup>a</sup>Zhejiang Provincial Key Laboratory of Advanced Chemical Engineering Manufacture Technology, College of Chemical and Biological Engineering, Zhejiang University, Hangzhou 310027, China

<sup>b</sup>College of Biology and Environmental Engineering, Zhejiang Shuren University, Hangzhou 310015, China

\*Corresponding authors.

(J. Yu) E-mail: yj313513@sina.com.

(L. Dai) E-mail: dailiyan@zju.edu.cn; Tel: +86 571 87952693; Fax: +86 571 87953294.

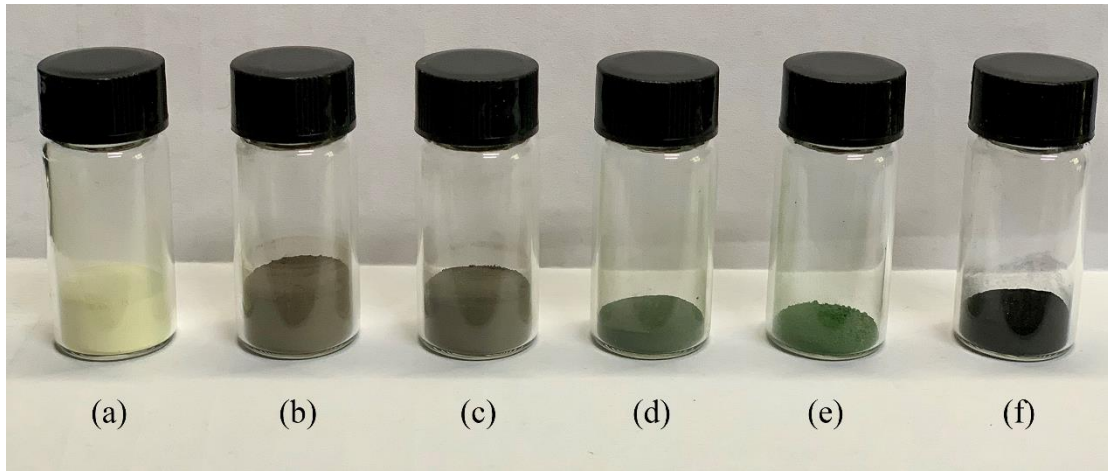

**Fig. S1** Different colors of as-prepared (a)  $g\text{-C}_3\text{N}_4$ , (b)  $\text{Cr}/g\text{-C}_3\text{N}_4\text{-300}$ , (c)  $\text{Cr}/g\text{-C}_3\text{N}_4\text{-350}$ , (d)  $\text{Cr}/g\text{-C}_3\text{N}_4\text{-400}$ , (e)  $\text{Cr}/g\text{-C}_3\text{N}_4\text{-500}$ , and (f)  $\text{Cr-300}$ .

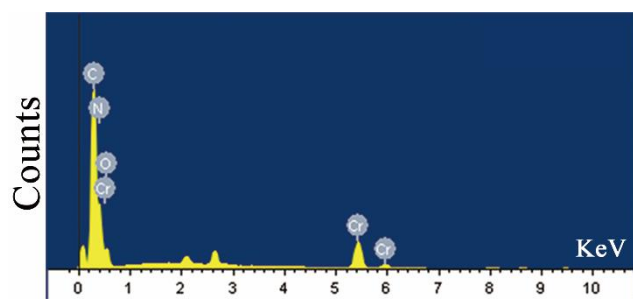

**Fig. S2** EDS spectrum of Cr/g-C<sub>3</sub>N<sub>4</sub>-300 catalyst.

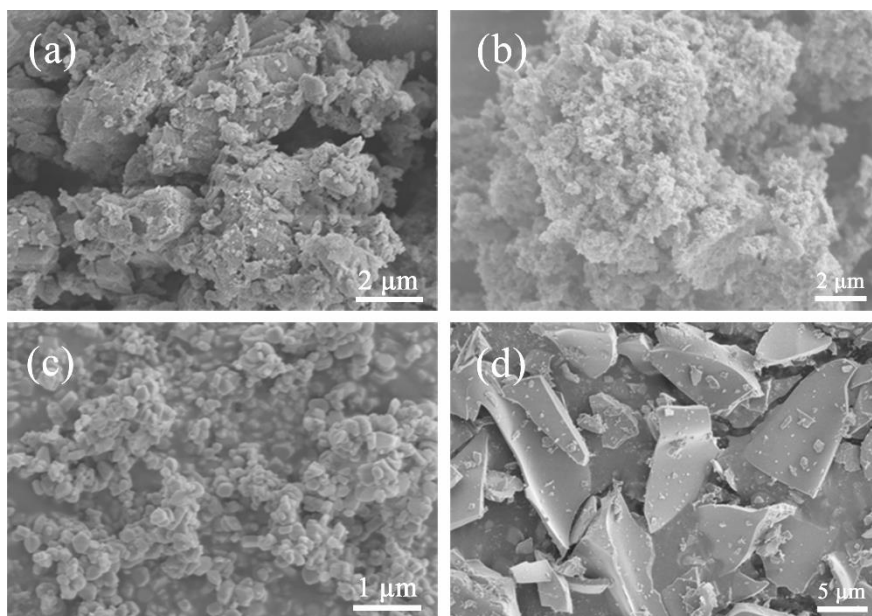

**Fig. S3** FESEM images of (a) Cr/g-C<sub>3</sub>N<sub>4</sub>-350, (b) Cr/g-C<sub>3</sub>N<sub>4</sub>-400, (c) Cr/g-C<sub>3</sub>N<sub>4</sub>-500, and (d) Cr-300 samples.

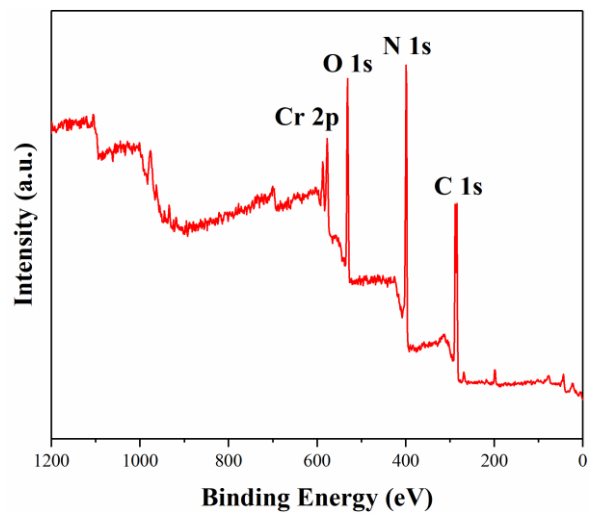

**Fig. S4** Wide-range XPS spectrum of Cr/g-C<sub>3</sub>N<sub>4</sub>-300 composite.

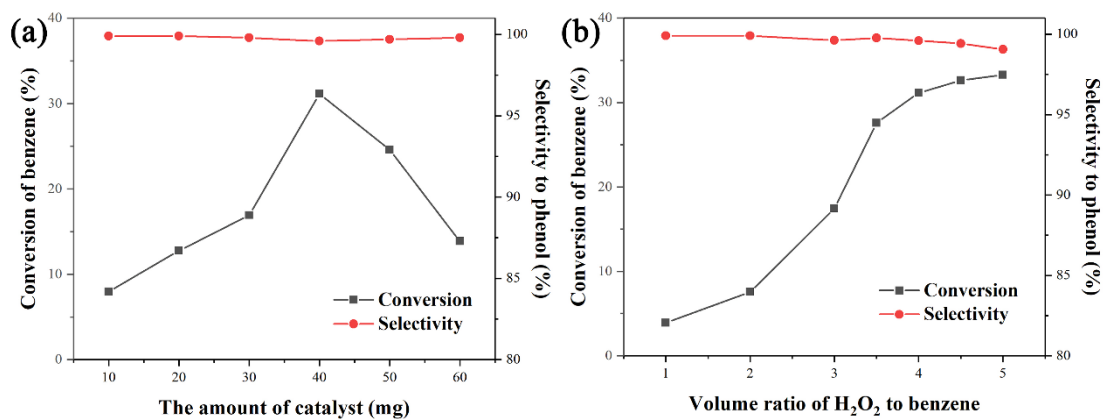

**Fig. S5** Catalytic performance of Cr/ g-C<sub>3</sub>N<sub>4</sub>-300 catalyst under different (a) amount of catalyst and (b) volume ratio of H<sub>2</sub>O<sub>2</sub> to benzene. Reaction conditions: 3.36 mmol of benzene, 2 mL of acetonitrile, T = 65 °C, t = 7 h, (a) 1.2 mL of 30 wt% H<sub>2</sub>O<sub>2</sub>, and (b) 40 mg of catalyst.
