# Supplementary figures and images for: Amorphous Cr-doped g-C3N4 as an efficient catalyst for the direct hydroxylation of benzene to phenol
Source: Royal Society of Chemistry journal article supplement (doi:10.1039/c9nj03483h), 2019-01-01

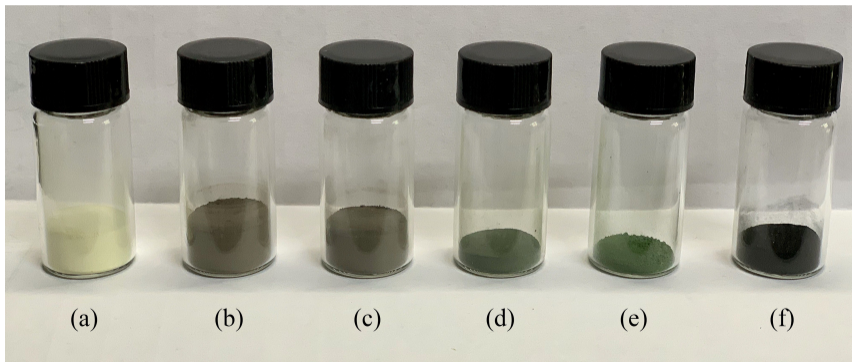

Supplement: c9nj03483h2.pdf [file c9nj03483h2.pdf]

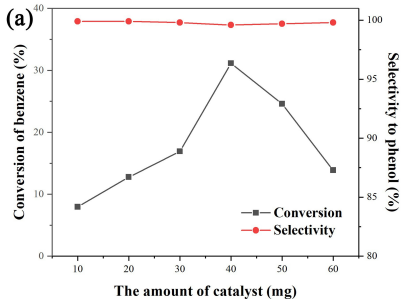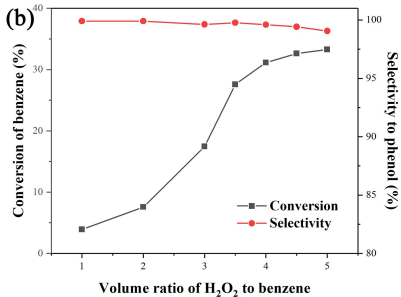

Supplement: c9nj03483h6.pdf [file c9nj03483h6.pdf]
